# Supplementary material
Source: PubMed Central journal article supplement (PMC3042551)
Supplement: mmc1.pdf [file mmc1.pdf]

Biophysical Journal, Volume 99

**Supporting Material**

**Role of the conformational versatility of the neurotrophin N-terminal regions in their recognition by Trk receptors**

Francesca Stanzione, Luciana Esposito, Antonella Paladino, Carlo Pedone, Giancarlo Morelli, and Luigi Vitagliano

**Supporting Material**

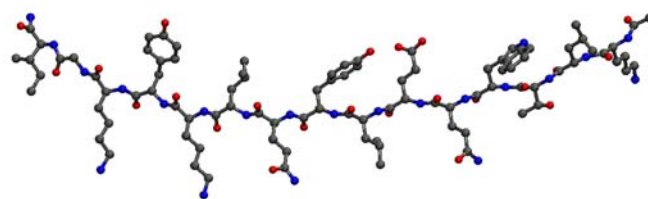

A

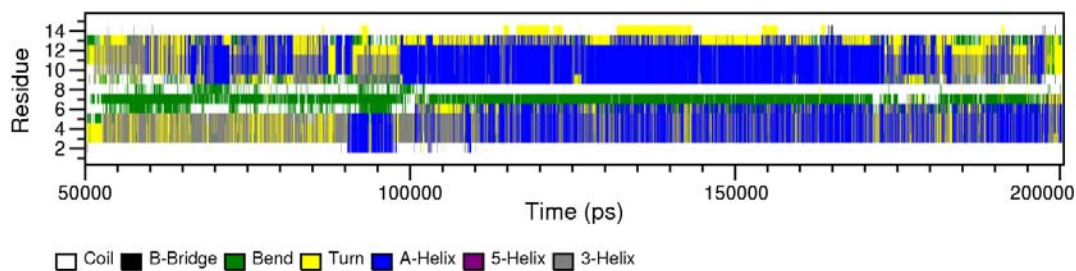

B

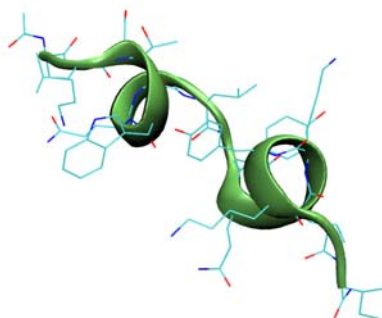

C

**Figure S1.**

Molecular dynamics simulation of QK-peptide: (A) starting model, (B) secondary structure formation along the trajectory, (C) a representative helical model selected from the structures of the trajectory.
